# Supplementary material for: Origins of Second Malignancies in Children and Mutational Footprint of Chemotherapy in Normal Tissues
Source: PubMed Central journal article supplement — Cancer Discov. 2024 Mar 19;14(6):953–64. doi: 10.1158/2159-8290.CD-23-1186 (PMC11145171; doi:10.1158/2159-8290.cd-23-1186), 2024-03-19
Supplement: cd-23-1186_supplementary_figure_s3_suppsf3.pdf [file cd-23-1186_supplementary_figure_s3_suppsf3.pdf]

# Supplementary Figure 3

A

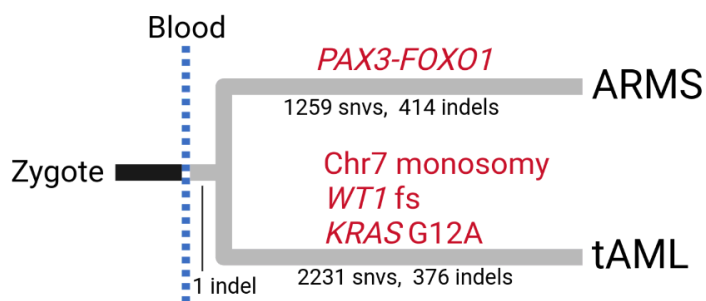

B

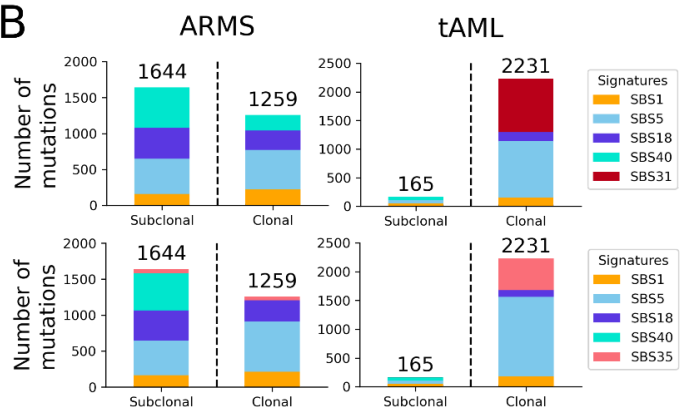

C

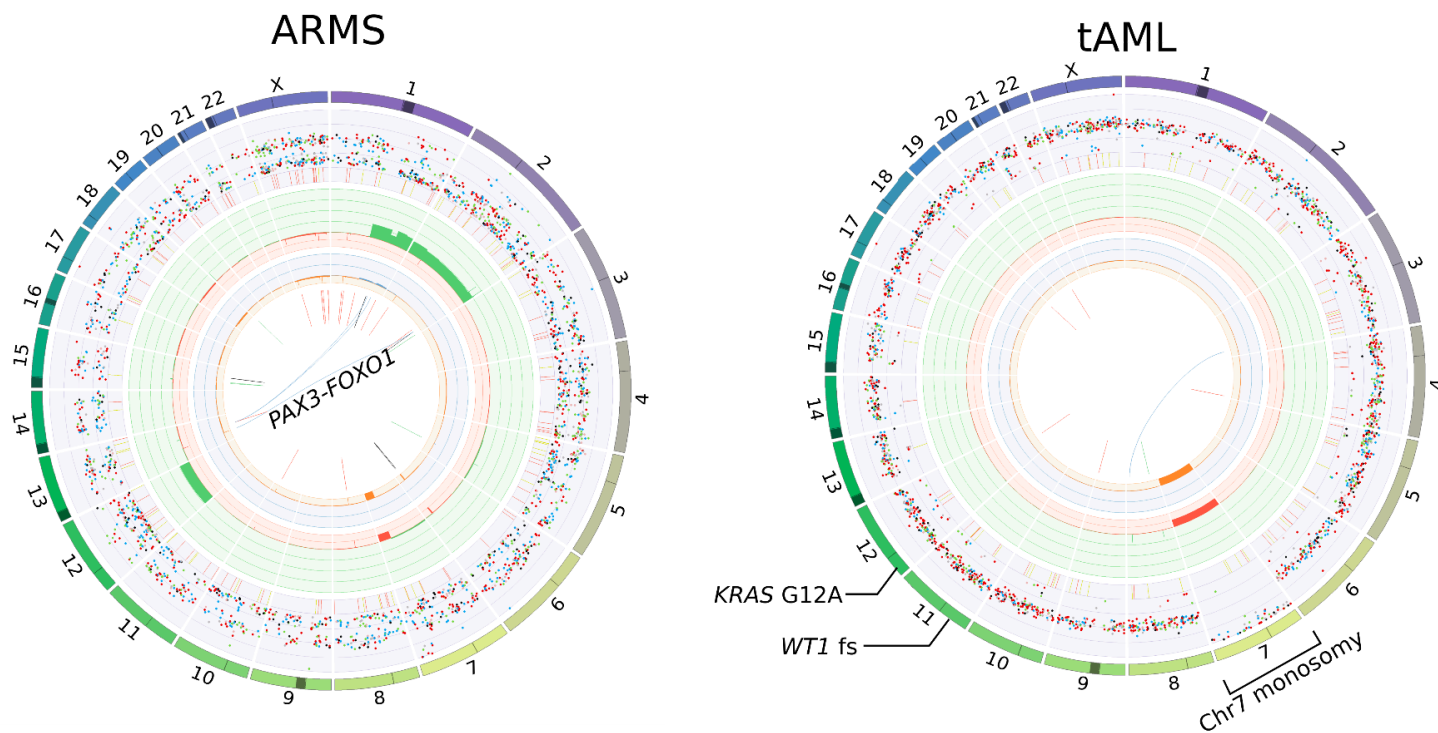

D

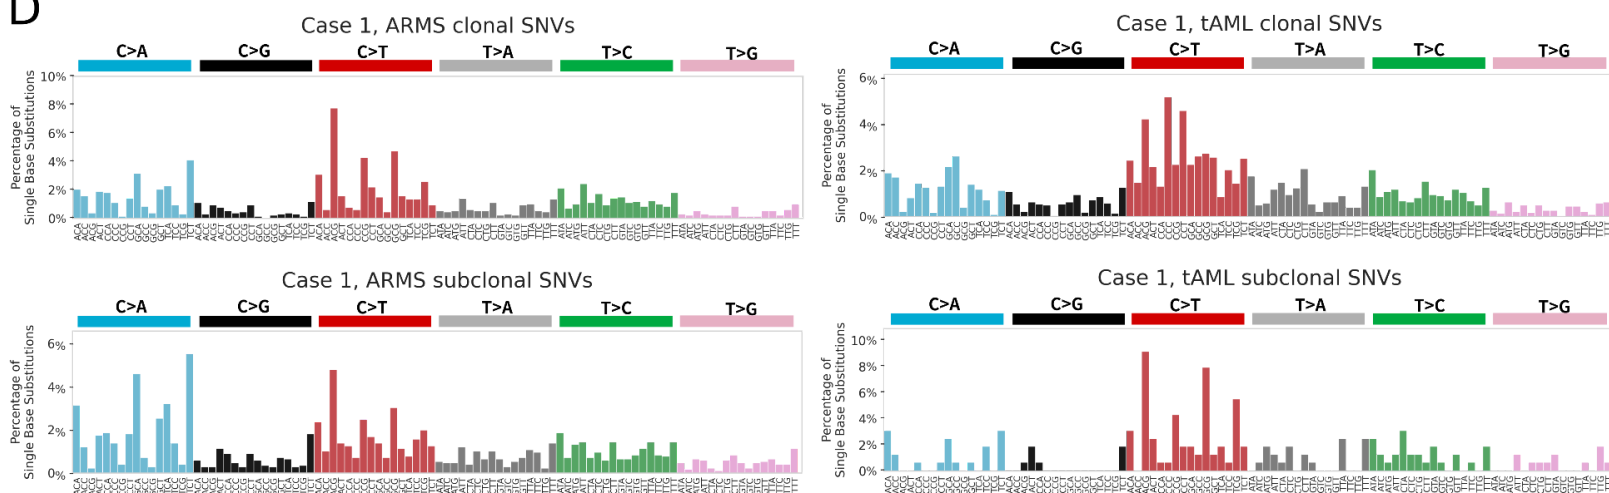

## Supplementary Figure 3. Signature analysis and representation of somatic alterations of the two tumors of case 1.

A) Case 1 tree representing the total number of somatic SNVs and indels detected across the tumor samples. In Figure 1B the same tree, but only with the numbers of supporting SNVs is shown. This is because the calling of SNVs is less noisy than that of indels. B) Mutational signatures fitted on clonal and subclonal SNVs in both case 1 tumors. C) Circos plot representing all somatic alterations identified in tumors 1 and 2 of case 1. D) Mutational profile of clonal and subclonal mutations of both tumors.
