# Supplementary material for: Origins of Second Malignancies in Children and Mutational Footprint of Chemotherapy in Normal Tissues
Source: PubMed Central journal article supplement — Cancer Discov. 2024 Mar 19;14(6):953–64. doi: 10.1158/2159-8290.CD-23-1186 (PMC11145171; doi:10.1158/2159-8290.cd-23-1186), 2024-03-19
Supplement: cd-23-1186_supplementary_figure_s7_suppsf7.pdf [file cd-23-1186_supplementary_figure_s7_suppsf7.pdf]

# Supplementary Figure 7

A

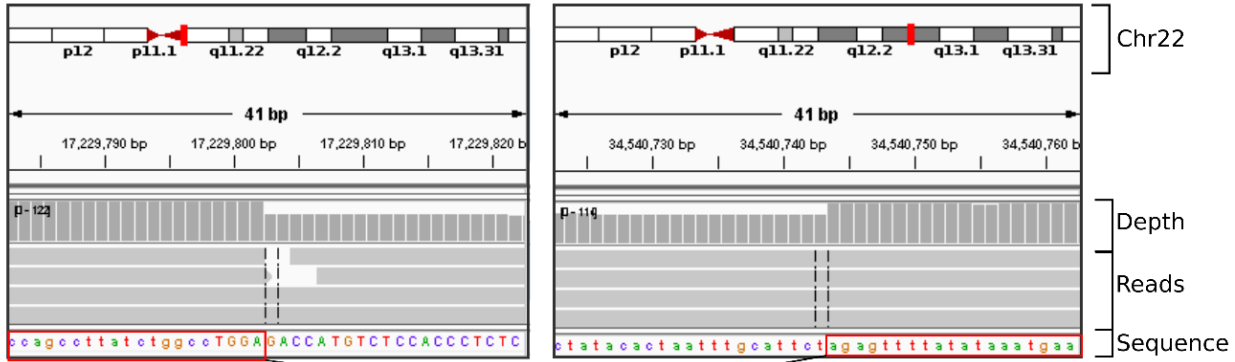

B

|                | SMARCB1 large deletion |    |       | SMARCB1 small indel |    |       |
|----------------|------------------------|----|-------|---------------------|----|-------|
|                | Mutation               | WT | Depth | Mutation            | WT | Depth |
| Rhabdoid tumor | 34                     | 56 | 90    | 31                  | 43 | 74    |
| Heart          | 3                      | 80 | 83    | 2                   | 85 | 87    |
| Kidney         | 0                      | 81 | 81    | 0                   | 81 | 81    |
| Liver          | 1                      | 90 | 91    | 0                   | 91 | 91    |
| Pancreas       | 1                      | 92 | 93    | 0                   | 76 | 76    |
| Blood          | 0                      | 88 | 88    | 0                   | 90 | 90    |
| Neuroblastoma  | 0                      | 83 | 83    | 0                   | 70 | 70    |

Sequence Mutation CTGGCCTGGA**AGAGTTTTAT**  
 Sequence WT CTGGCCTGGAGACCATGTCT

GAACATCCATAAACATTTC  
 GAACATCCAT**GTGGG**AACATTTC

C

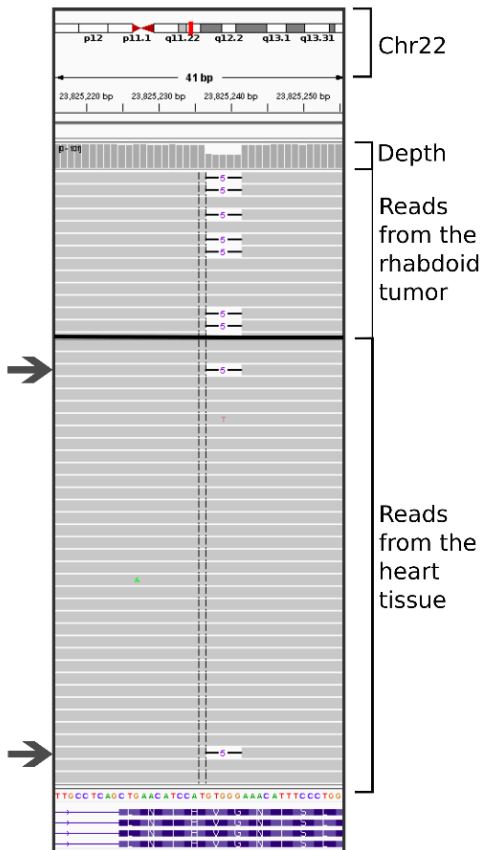

D

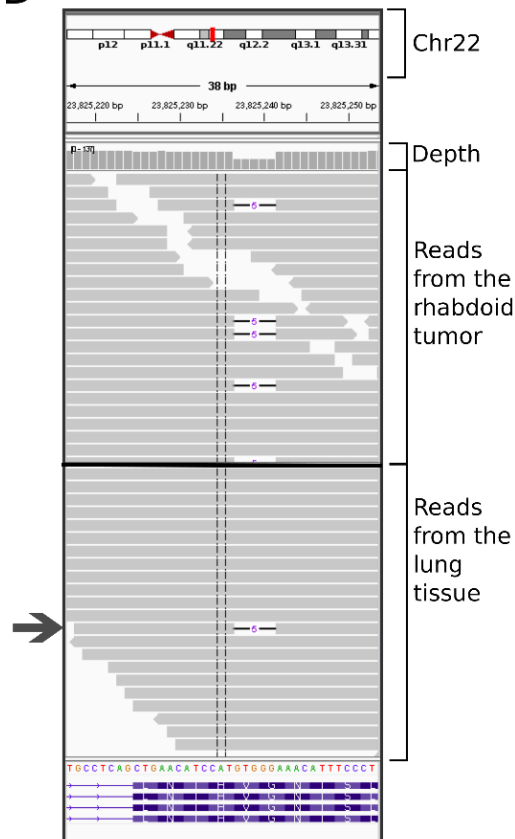

**Supplementary Figure 7. Visualization of WGS alignment data showing evidence of *SMARCB1* driver alterations in normal tissues from case 3.**

A) Left and right flanks of the breakpoint of the large deletion in chromosome 22. B) Table summarizing the number of reads WT and with the *SMARCB1* alterations. C) Visualization of the 2 *SMARCB1* indel variants found in heart sample. D) Visualization of the *SMARCB1*-indel read in lung tissue. All snapshots correspond to sequencing read alignments visualized using the IGV.
