# Supplementary material for: Origins of Second Malignancies in Children and Mutational Footprint of Chemotherapy in Normal Tissues
Source: PubMed Central journal article supplement — Cancer Discov. 2024 Mar 19;14(6):953–64. doi: 10.1158/2159-8290.CD-23-1186 (PMC11145171; doi:10.1158/2159-8290.cd-23-1186), 2024-03-19
Supplement: cd-23-1186_supplementary_figure_s8_suppsf8.pdf [file cd-23-1186_supplementary_figure_s8_suppsf8.pdf]

# Supplementary Figure 8

A

SMARCB1 variant detection by digital PCR

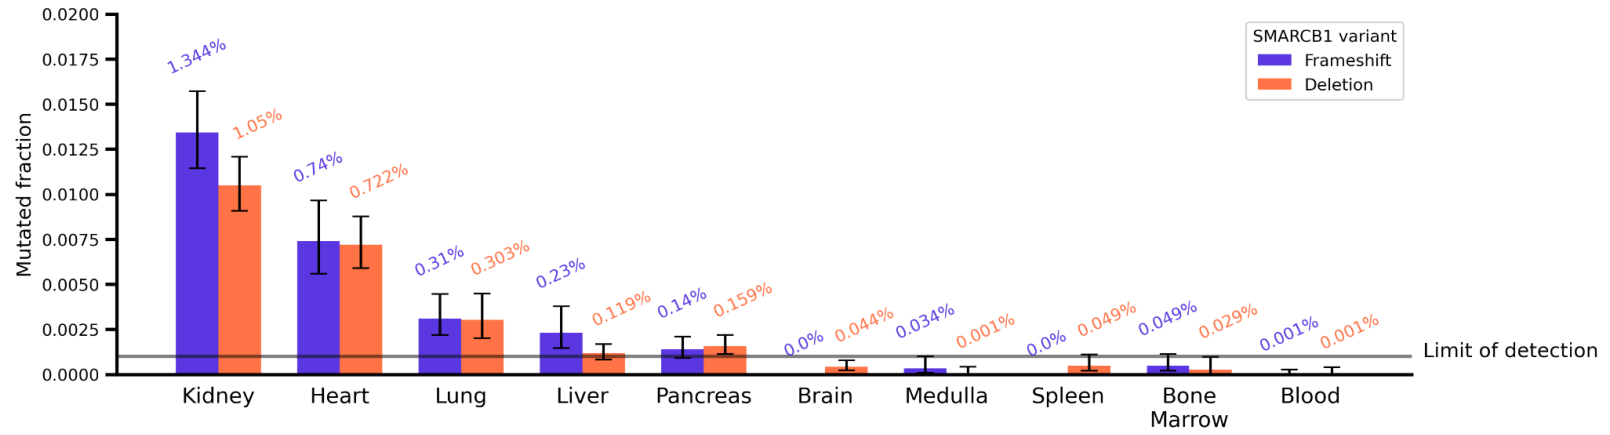

B

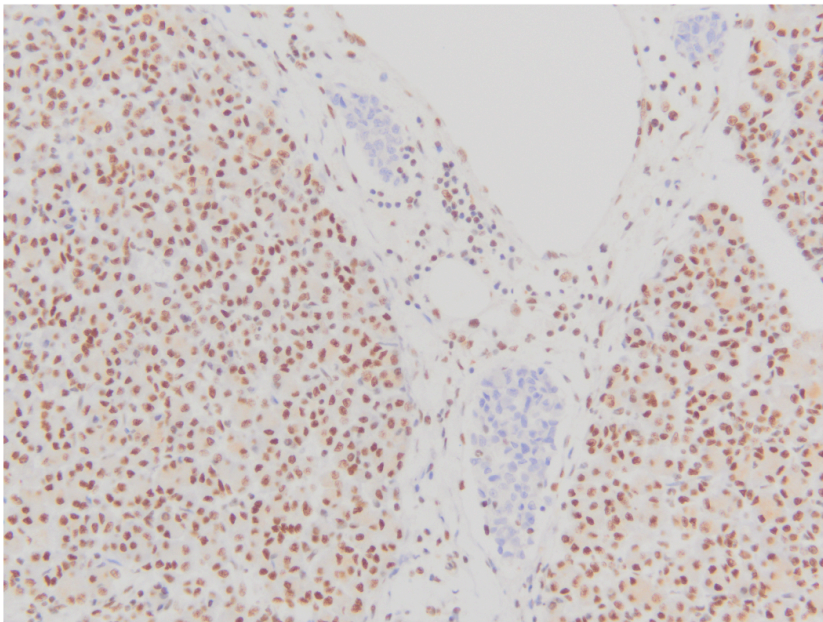

INI1 IHC  
Pancreas

**Supplementary Figure 8. SMARCB1 null cells identified in normal tissues of case 3.**

A) Results of digital PCR for the two *SMARCB1* mutations across 10 normal tissues of case 3. B) Immunohistochemistry (IHC) INI1 protein in normal pancreas tissue. This demonstrates the presence of MRT cells infiltrating the normal tissue.
