# Supplementary material for: Origins of Second Malignancies in Children and Mutational Footprint of Chemotherapy in Normal Tissues
Source: PubMed Central journal article supplement — Cancer Discov. 2024 Mar 19;14(6):953–64. doi: 10.1158/2159-8290.CD-23-1186 (PMC11145171; doi:10.1158/2159-8290.cd-23-1186), 2024-03-19
Supplement: cd-23-1186_supplementary_figure_s9_suppsf9.pdf [file cd-23-1186_supplementary_figure_s9_suppsf9.pdf]

# Supplementary Figure 9

A

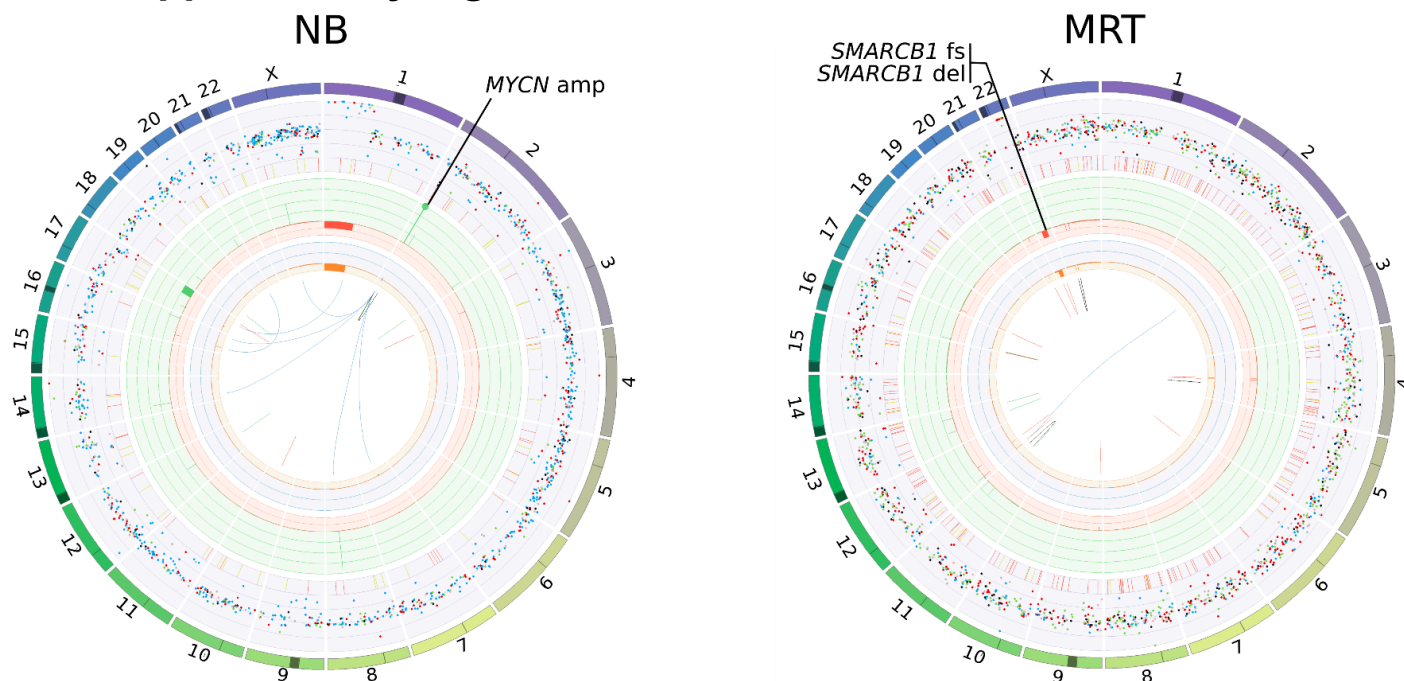

B

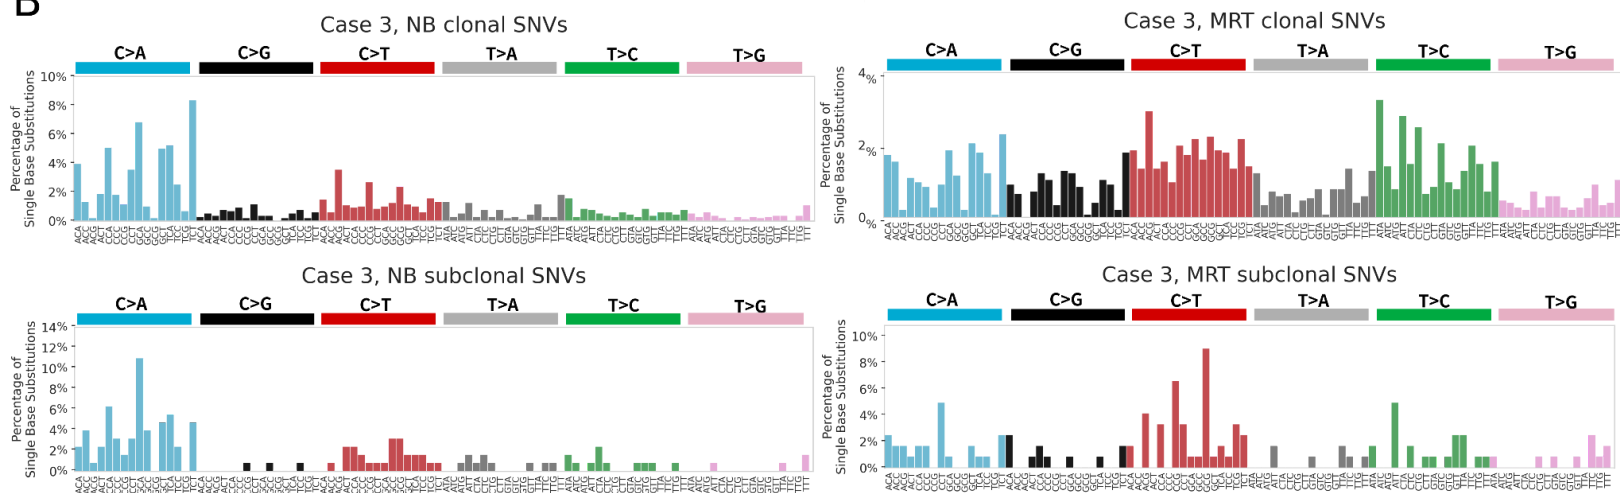

**Supplementary Figure 9. Representation of somatic alterations of the two tumors of case 3.**

A) Circos plot representing all somatic alterations identified in tumors 1 and 2 of case 3.

B) Mutational profile of clonal and subclonal mutations of both tumors.
