# Supplementary material for: Origins of Second Malignancies in Children and Mutational Footprint of Chemotherapy in Normal Tissues
Source: PubMed Central journal article supplement — Cancer Discov. 2024 Mar 19;14(6):953–64. doi: 10.1158/2159-8290.CD-23-1186 (PMC11145171; doi:10.1158/2159-8290.cd-23-1186), 2024-03-19
Supplement: cd-23-1186_supplementary_figure_s11_suppsf11.pdf [file cd-23-1186_supplementary_figure_s11_suppsf11.pdf]

# Supplementary Figure 11

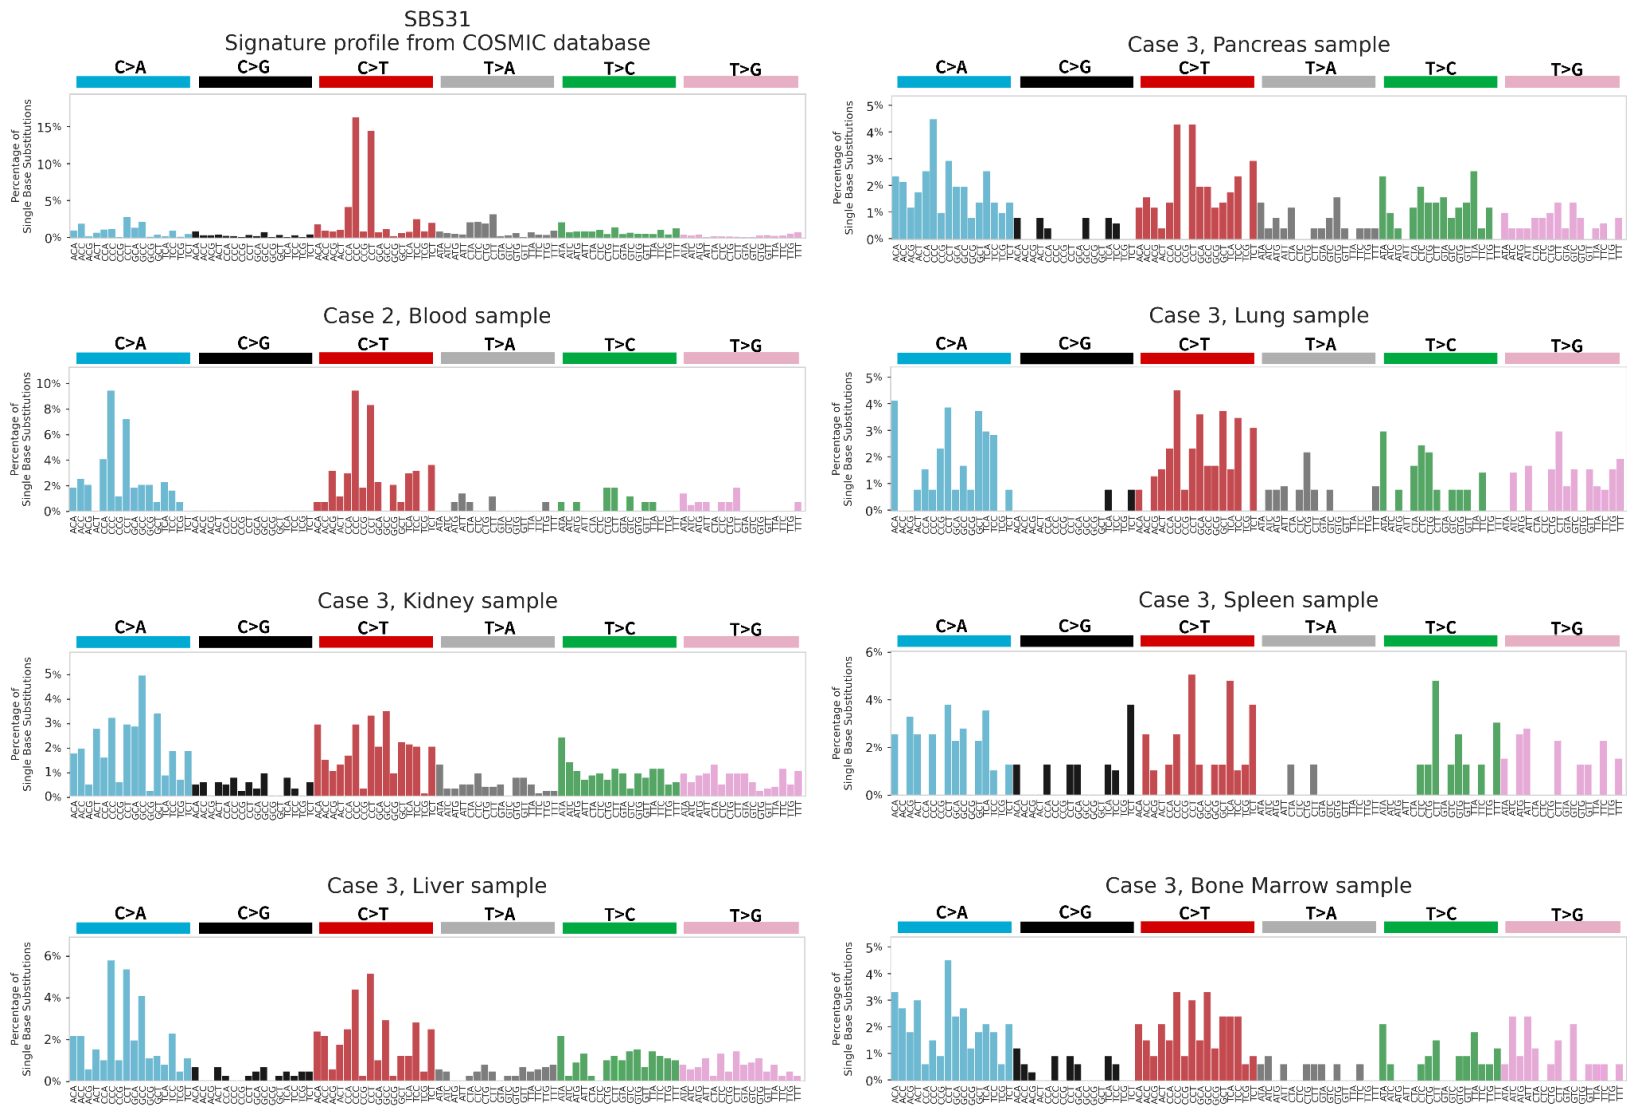

**Supplementary Figure 11. Mutational profiles of the samples sequenced with Duplex Sequencing.** Upper-left panel is the SBS31 mutational profile from the COSMIC database. Depicted are the profiles from case 2 blood sample and case 3 kidney, liver, pancreas, lung, spleen and bone marrow samples.
