# Supplementary material for: Origins of Second Malignancies in Children and Mutational Footprint of Chemotherapy in Normal Tissues
Source: PubMed Central journal article supplement — Cancer Discov. 2024 Mar 19;14(6):953–64. doi: 10.1158/2159-8290.CD-23-1186 (PMC11145171; doi:10.1158/2159-8290.cd-23-1186), 2024-03-19
Supplement: cd-23-1186_supplementary_figure_s12_suppsf12.pdf [file cd-23-1186_supplementary_figure_s12_suppsf12.pdf]

# Supplementary Figure 12

A

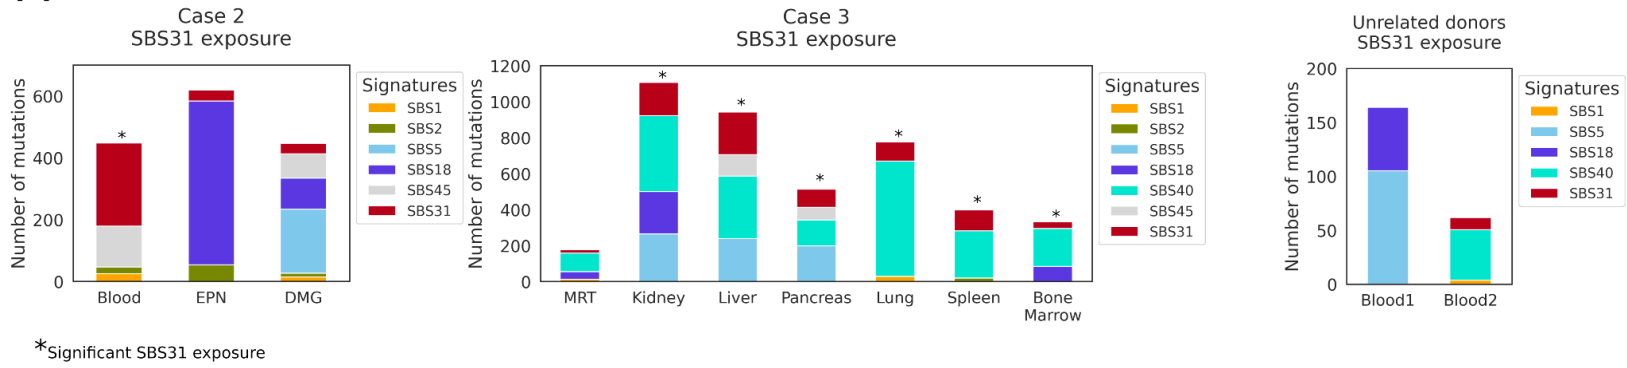

B

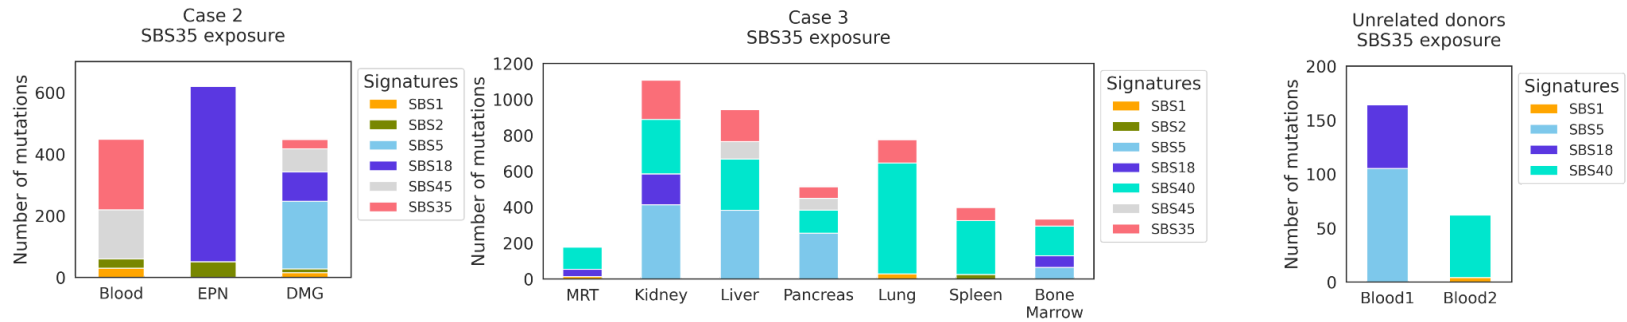

**Supplementary Figure 12. Signature fitting analysis to assess the activity of SBS31 and SBS35 across samples.**

A) SBS31 and B) SBS35 fitting analysis of blood, EPN and DMG samples from case 2 (left panel); MRT, kidney, liver, pancreas, lung, spleen and bone marrow samples from case 3 (middle panel); and blood samples from unrelated untreated donors (right panel). Asterisks denote specific SBS31 exposure by the specificity analysis performed (see *Platinum signatures specificity analysis* in Supplementary Methods).
