# Supplementary material for: Origins of Second Malignancies in Children and Mutational Footprint of Chemotherapy in Normal Tissues
Source: PubMed Central journal article supplement — Cancer Discov. 2024 Mar 19;14(6):953–64. doi: 10.1158/2159-8290.CD-23-1186 (PMC11145171; doi:10.1158/2159-8290.cd-23-1186), 2024-03-19
Supplement: cd-23-1186_supplementary_table_s1_suppst1.pdf [file cd-23-1186_supplementary_table_s1_suppst1.pdf]

**Supplementary Table 1**

| Case | Gene     | Role in cancer | Variant type          | Amino acid change | gnomADg Allele Frequency |
|------|----------|----------------|-----------------------|-------------------|--------------------------|
| 1    | ATM      | LoF            | Missense              | V182L             | 0.007418                 |
| 1    | ATM      | LoF            | Missense              | R2854C            | 0.000126                 |
| 1    | EGFR     | Act            | Missense              | A1210V            | 0.000328                 |
| 1    | MET      | Act            | Splice region variant | -                 | 0.001314                 |
| 1    | CBL      | Act            | Missense              | P687L             | 0.000119                 |
| 1    | ITK      | NA             | Missense              | R193Q             | 0.003875                 |
| 1    | EP300    | LoF            | Missense              | G211S             | 0.006329                 |
| 1    | FAT1     | LoF            | Missense              | F2549L            | 0.000223                 |
| 1    | FANCM    | NA             | Missense              | D556G             | 0.000105                 |
| 1    | JMJD1C   | NA             | Missense              | S1429L            | 0.000545                 |
| 1    | NDRG4    | NA             | Splice region variant | -                 | 0.000077                 |
| 2    | DICER1   | LoF            | Missense              | Y1385C            | 0                        |
| 2    | SERPINA1 | NA             | Frameshift            | E347X             | 0.000253                 |
| 2    | WRN      | LoF            | Missense              | T1262R            | 0.002702                 |
| 2    | CFTR     | NA             | Missense              | G576A             | 0.005081                 |
| 2    | CFTR     | NA             | Missense              | R668C             | 0.006121                 |
| 3    | RAF1     | Act            | Splice region variant | H389              | 0.000063                 |
| 3    | RAD50    | NA             | Missense              | Q426R             | 0.000147                 |
| 3    | CDH1     | LoF            | Missense              | P30T              | 0.001278                 |
| 3    | COL7A1   | NA             | Missense              | G636V             | 0.004155                 |
| 3    | RTEL1    | NA             | Inframe               | GE770-771G        | 0.004962                 |
| 3    | GBA      | NA             | Missense              | T408M             | 0.006204                 |
| 3    | SLX4     | NA             | Missense              | R237Q             | 0.008306                 |
| 4    | PTCH1    | LoF            | Missense              | D436N             | 0.000824                 |
| 4    | SDHD     | LoF            | Missense              | G12S              | 0.006979                 |
| 4    | SDHB     | LoF            | Missense              | G53E              | 0.000405                 |
| 4    | MET      | Act            | Missense              | T1010I            | 0.00897                  |
| 4    | PDGFRA   | Act            | Missense              | G79D              | 0.008872                 |
| 4    | WAS      | Act            | Missense              | V332A             | 0.004856                 |
| 4    | SERPINA1 | NA             | Frameshift            | E347X             | 0.000253                 |
| 4    | AR       | Act            | Inframe               | GGGGG457-461-     | 0.009286                 |
| 4    | JMJD1C   | NA             | Missense              | F130Y             | 0.000049                 |
| 4    | SHOC2    | NA             | Missense              | E25G              | 0.000077                 |

**Supplementary Table 1. Germline SNVs and indels found in known cancer predisposing genes.**

Gene: HGNC Symbol; Role in cancer: Loss of Function (LoF), NA (Not known, ambiguous); Variant type: Missense, Frameshift (truncating), Splice region variant, Inframe; Amino acid change: Reference amino acid + protein position + mutated amino acid; gnomADg Allele Frequency: allele frequency of the mutation in gnomADg population. No clear predisposing variant is present in any child.
